# Supplementary material
Source: PubMed Central journal article supplement (PMC3153113)

## Supplement 1

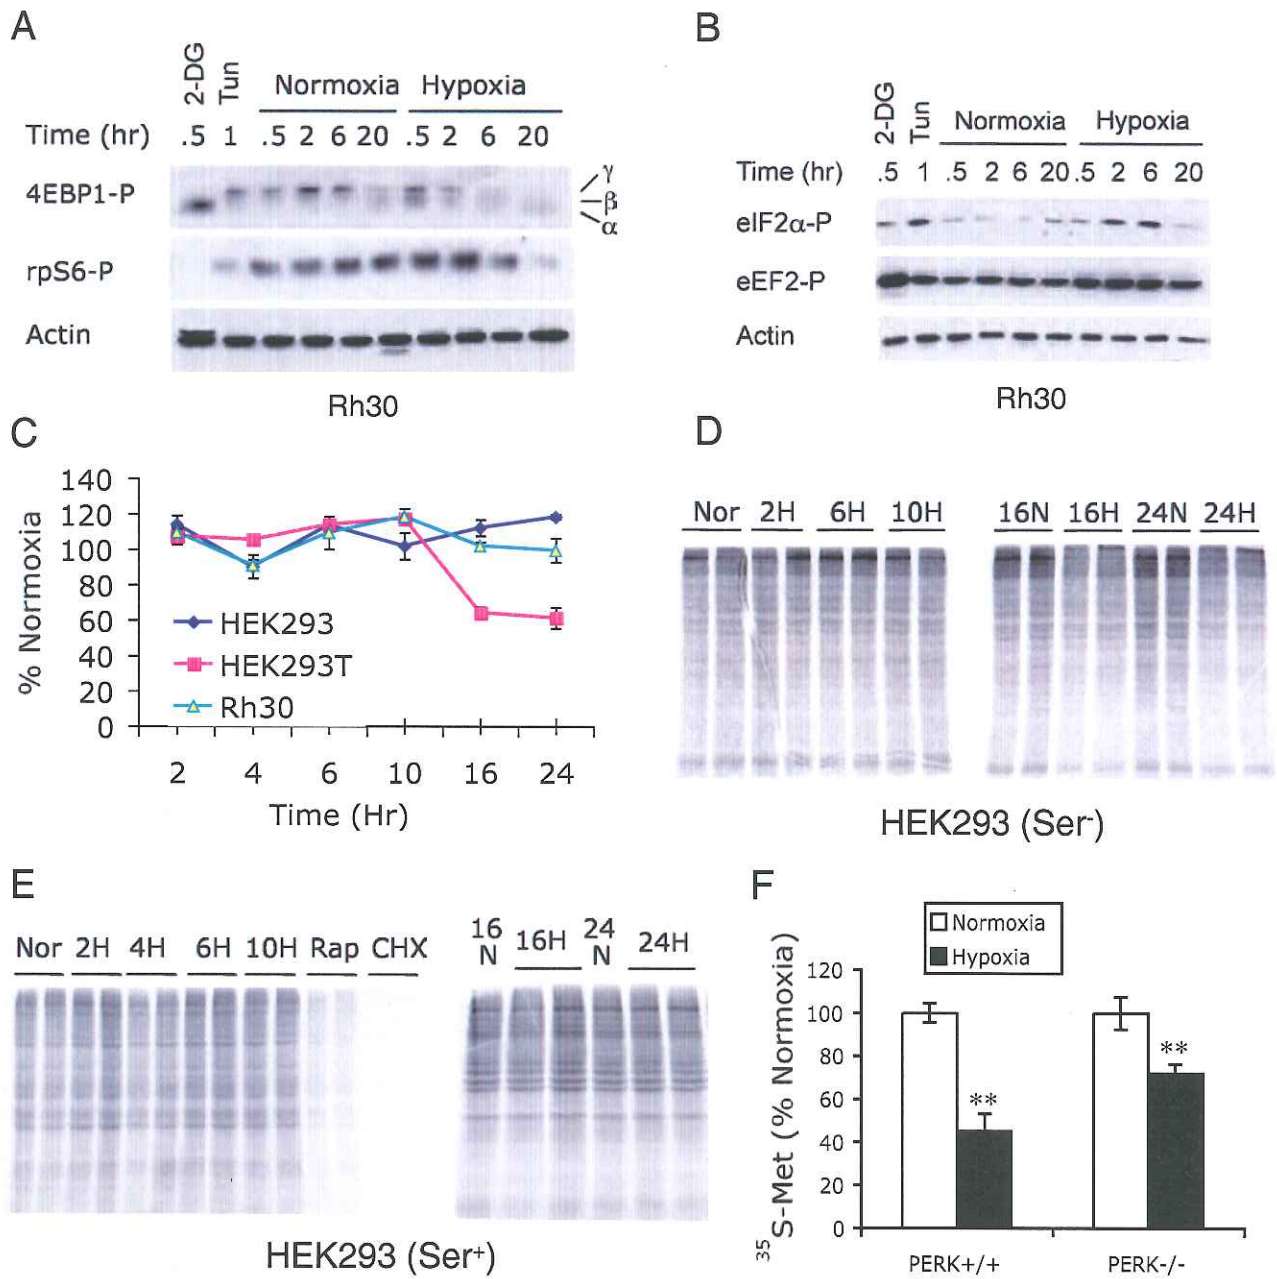

Supplement: NIHMS312194-supplement-Supplementary_Data_1.pdf [file NIHMS312194-supplement-Supplementary_Data_1.pdf]

Supplement 2

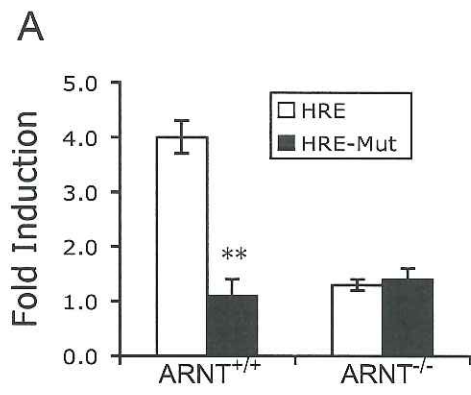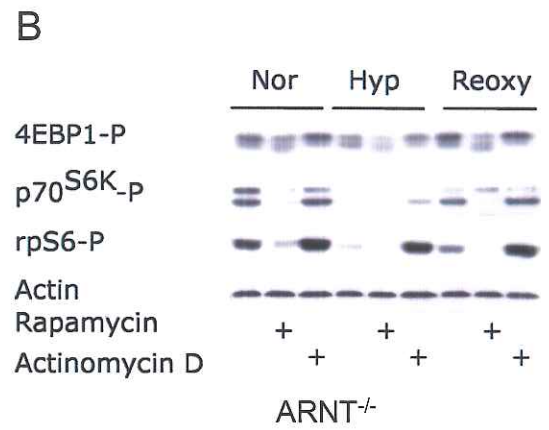

Supplement: NIHMS312194-supplement-Supplementary_Data_2.pdf [file NIHMS312194-supplement-Supplementary_Data_2.pdf]

### Supplement 3

**A**

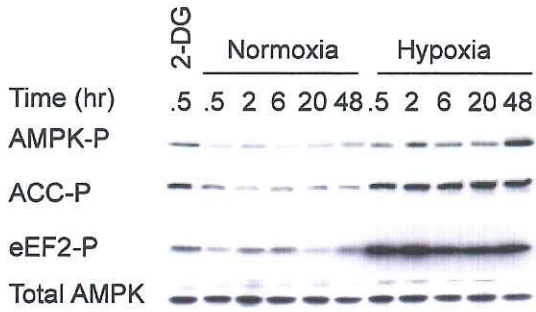

HEK293

**B**

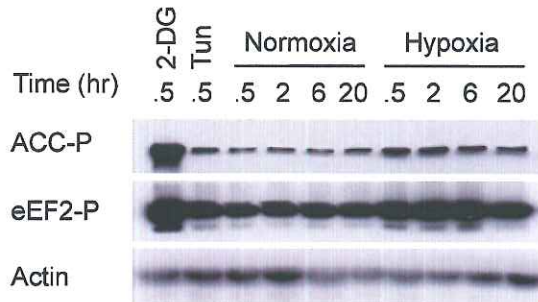

Rh30

**C**

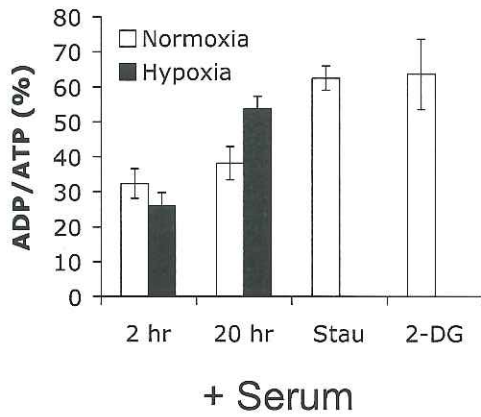

**D**

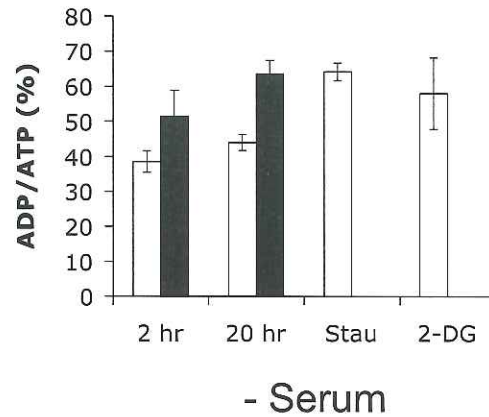

Supplement: NIHMS312194-supplement-Supplementary_Data_3.pdf [file NIHMS312194-supplement-Supplementary_Data_3.pdf]

Supplement 4

A

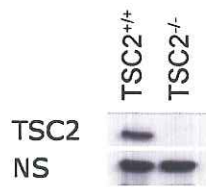

B

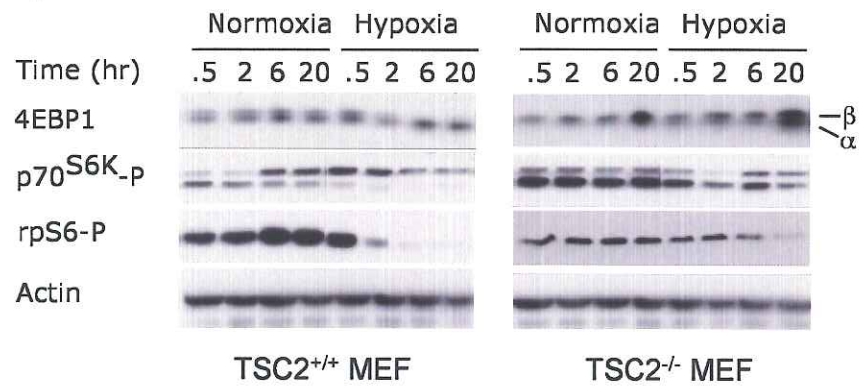

Supplement: NIHMS312194-supplement-Supplementary_Data_4.pdf [file NIHMS312194-supplement-Supplementary_Data_4.pdf]
